# Supplementary material for: Single-crystal XRD and solid-state NMR structural resolution of a layered fluorinated gallium phosphate: RbGa3(PO4)2(HPO4)F4·C5N2H16·2H2O (MIL-145)
Source: Royal Society of Chemistry journal article supplement (doi:10.1039/c2dt31464a), 2012-10-16
Supplement: c2dt31464a.pdf [file c2dt31464a.pdf]

## Single-crystal XRD and solid-state NMR structural resolution of a layered fluorinated gallium phosphate: $\text{RbGa}_4(\text{PO}_4)_3\text{F}_4 \cdot \text{C}_5\text{N}_2\text{H}_{14} \cdot 2\text{H}_2\text{O}$ (MIL-145)

Charlotte Martineau,<sup>a</sup> Thierry Loiseau,<sup>a,b</sup> Lionel Beitone,<sup>a</sup> Gérard Férey,<sup>a</sup> Boris Bouchevreau and Francis Taulelle.<sup>a</sup>

<sup>a</sup> Institut Lavoisier de Versailles (ILV), UMR CNRS 8180, Université de Versailles Saint Quentin, 45, avenue des Etats-Unis, 78035 Versailles cedex, France.

<sup>a</sup> present address: Unité de Catalyse et Chimie du Solide (UCCS), UMR CNRS 8181, Université de Lille Nord de France – ENSCL, Bât. C7, BP 90108, 59652 Villeneuve d'Ascq, France.

## Electronic Supplementary Information

To be submitted to *Dalton trans.*

Version july 4, 2012

Revised august 29, 2012

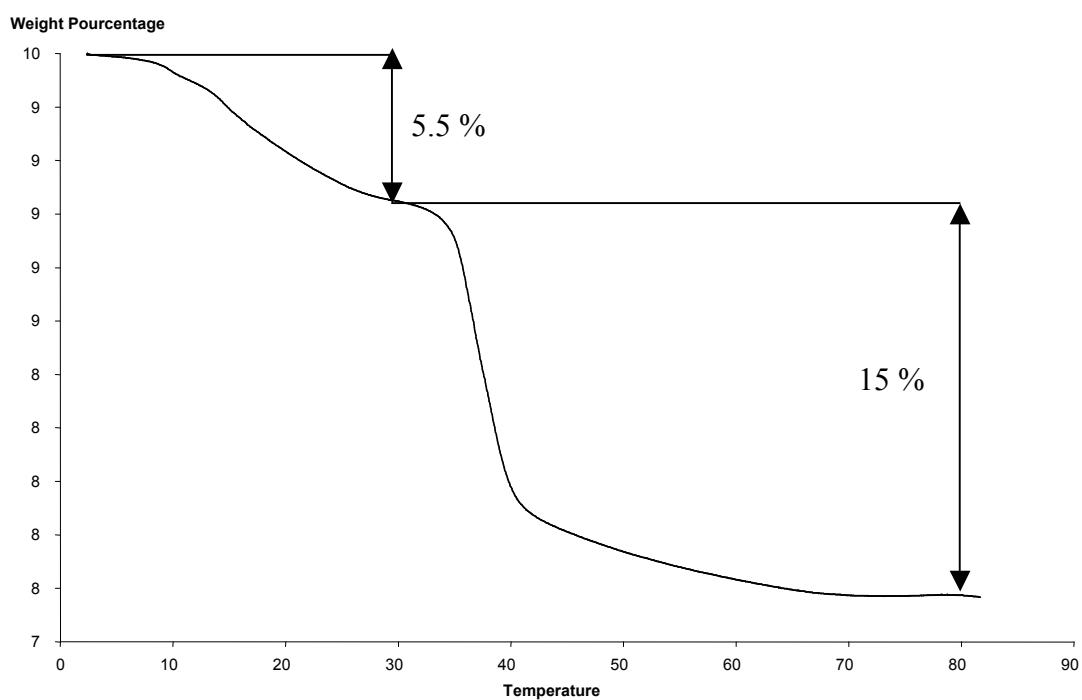

**Fig. S1** Thermogravimetric curve of  $\text{RbGa}_4(\text{PO}_4)_3\text{F}_4 \cdot \text{C}_5\text{N}_2\text{H}_{14} \cdot 2\text{H}_2\text{O}$  or MIL-145 (under  $\text{O}_2$ ,  $2^\circ\text{C} \cdot \text{min}^{-1}$ ).

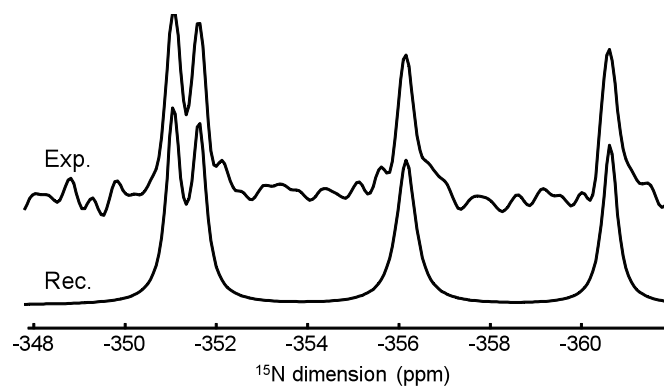

**Fig S2** Experimental and reconstructed  $^1\text{H}\rightarrow^{15}\text{N}$  CPMAS NMR spectra of  $\text{RbGa}_4(\text{PO}_4)_3\text{F}_4\cdot\text{C}_5\text{N}_2\text{H}_{14}\cdot 2\text{H}_2\text{O}$  (MIL-145) showing the presence of four inequivalent nitrogen atoms.

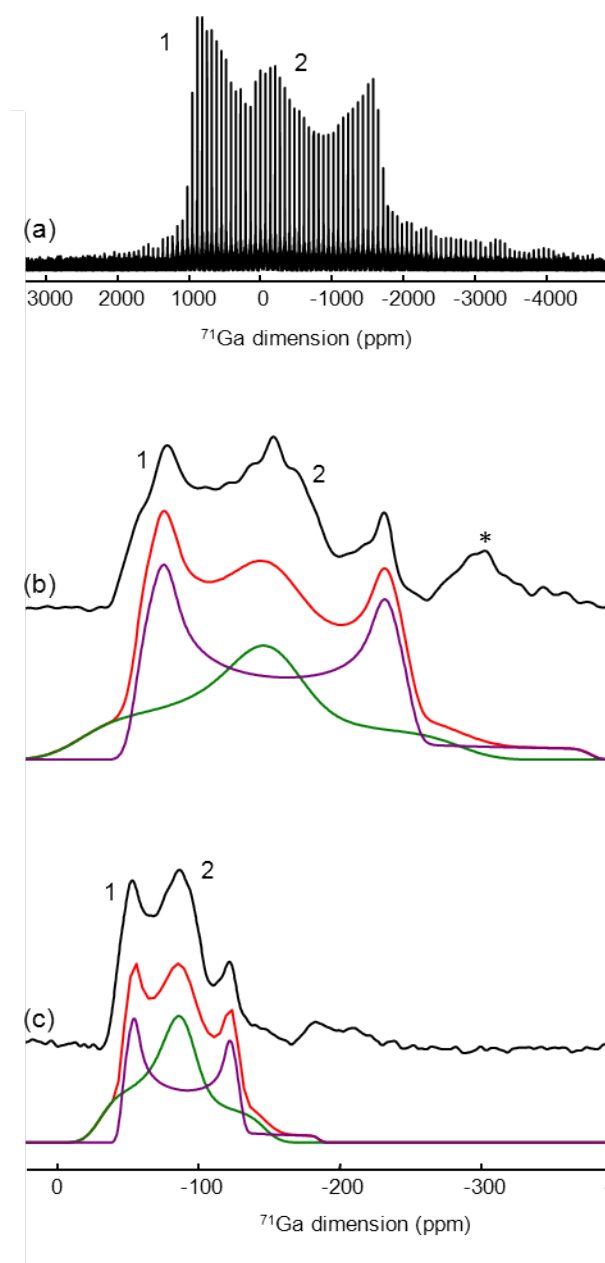

**Fig. S3.**  $^{71}\text{Ga}$  NMR spectra of  $\text{RbGa}_3(\text{PO}_4)_2(\text{HPO}_4)\text{F}_4 \cdot \text{C}_5\text{N}_2\text{H}_{16} \cdot 2\text{H}_2\text{O}$  (MIL-145). (a) Static WURST-QCPMG spikelet spectrum recorded at  $B_0 = 4.7$  T. Single pulse NMR spectra recorded at (b)  $B_0 = 11.7$  T and  $\nu_{\text{MAS}} = 34$  kHz and (c)  $B_0 = 17.6$  T and  $\nu_{\text{MAS}} = 30$  kHz. The reconstructed MAS NMR spectra are shown below. The star represents an unidentified impurity.

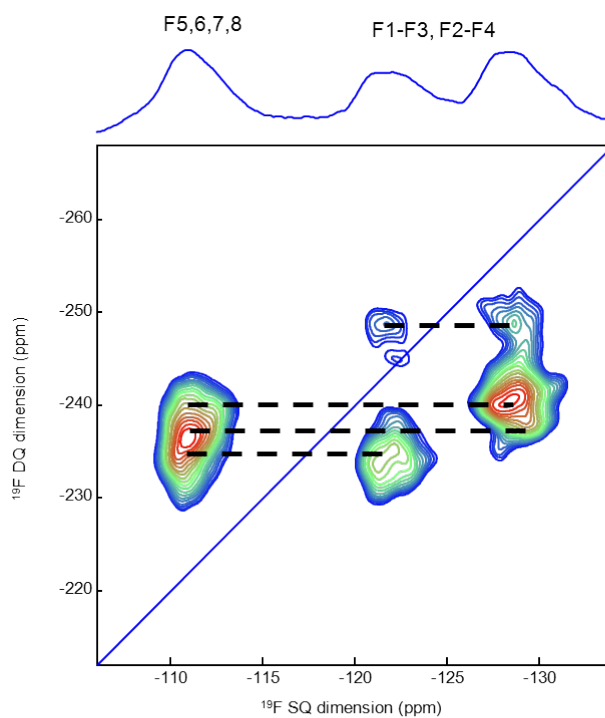

**Fig. S4.** 2D  $^{19}\text{F} \rightarrow ^{19}\text{F}$  DQ-SQ NMR spectrum of  $\text{RbGa}_4(\text{PO}_4)_3\text{F}_4 \cdot \text{C}_5\text{N}_2\text{H}_{14} \cdot 2\text{H}_2\text{O}$  (MIL-145). The top spectrum, on which lines are labeled, is the full projection on the horizontal dimension. The thick line indicates the diagonal of slope 2. Dash lines indicate F-F cross-correlations.

Some additional comments on the data collection:

*The completeness is reported as 0.913 is quite low but if one slightly reduces the theta range, the completeness is greater than 0.99 for the coverage up to 28.0° for instance.*
